# Supplementary material for: Laccase–silica nanoparticle conjugates can efficiently reduce the early maturation risk due to BPA in female Oreochromis mossambicus and its toxic load from the contaminated effluent
Source: Royal Society of Chemistry journal article supplement (doi:10.1039/c7en00070g), 2017-01-01

## Supplementary figures:

### Figure: Sp-1) Histopathology of liver, ovary and testis.

#### Effect of laccase-nanoparticle conjugates on liver.

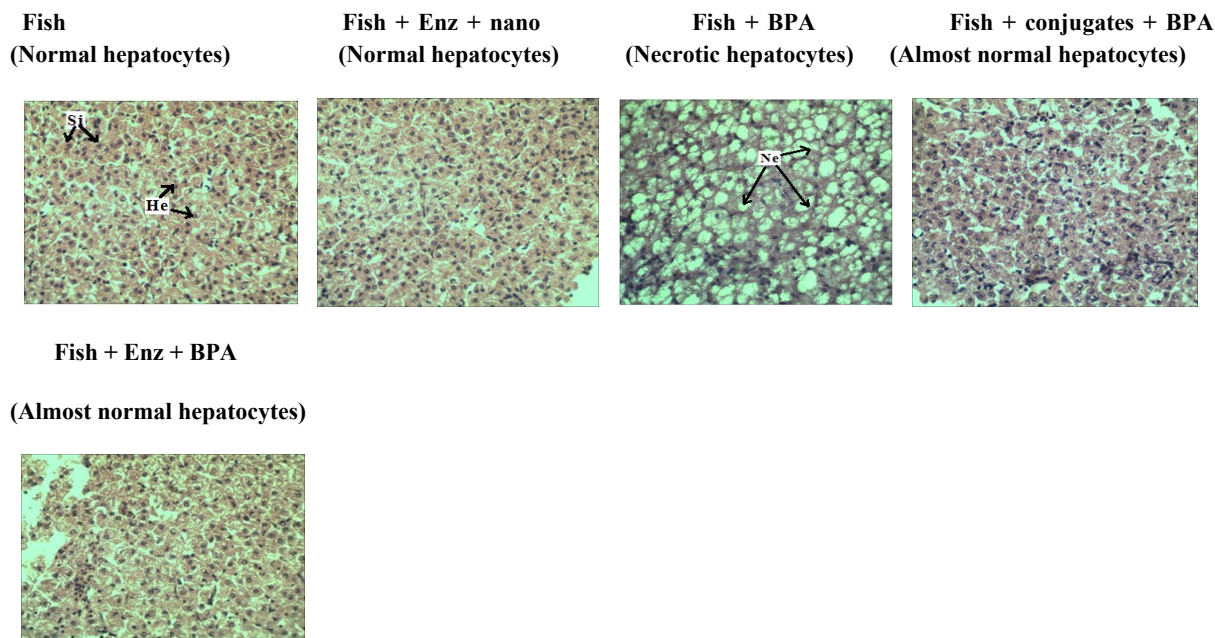

[Si-Sinusoids, He- Hepatocytes, Ne- Necrotic.]

#### Effect of laccase-nanoparticle conjugates on Ovary.

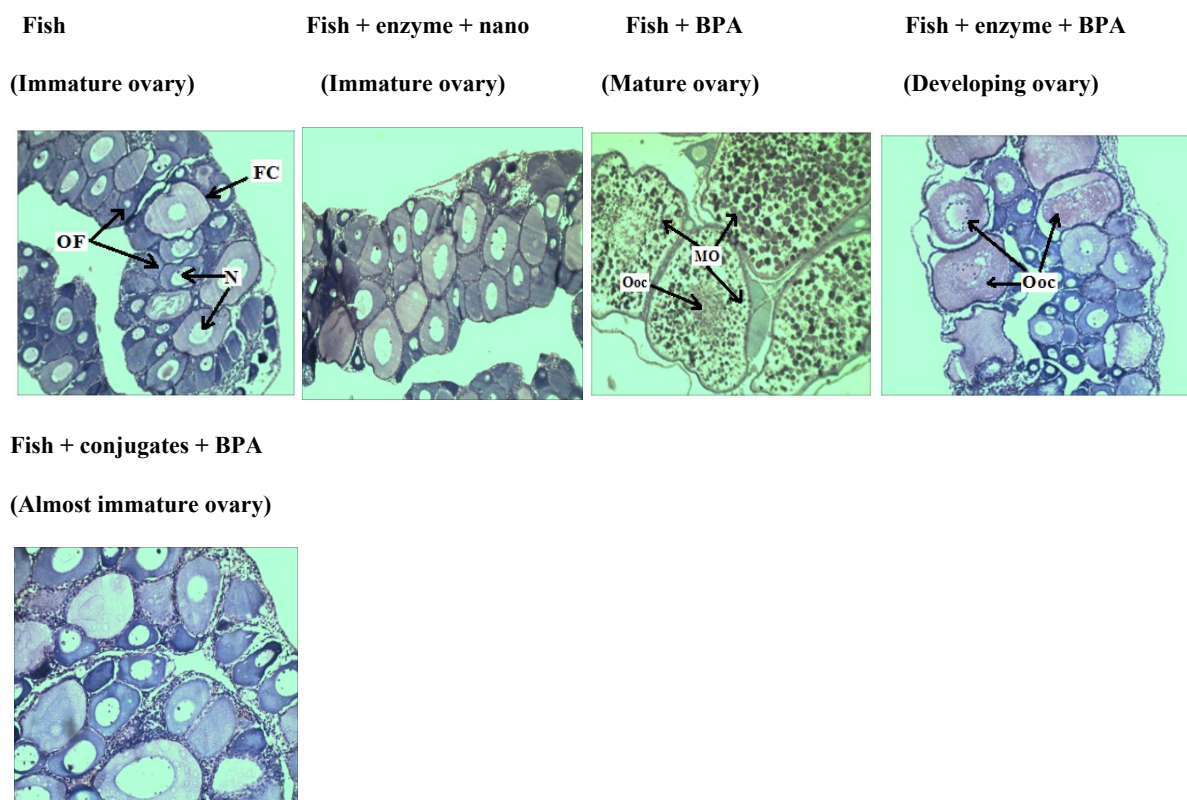

[FC-Follicle cells, OF-Ovigerous folds, N-Nucleus, Ooc-Oocytes, Mo-Mature oocytes.]

Effect of laccase-nanoparticle conjugates on Testis.

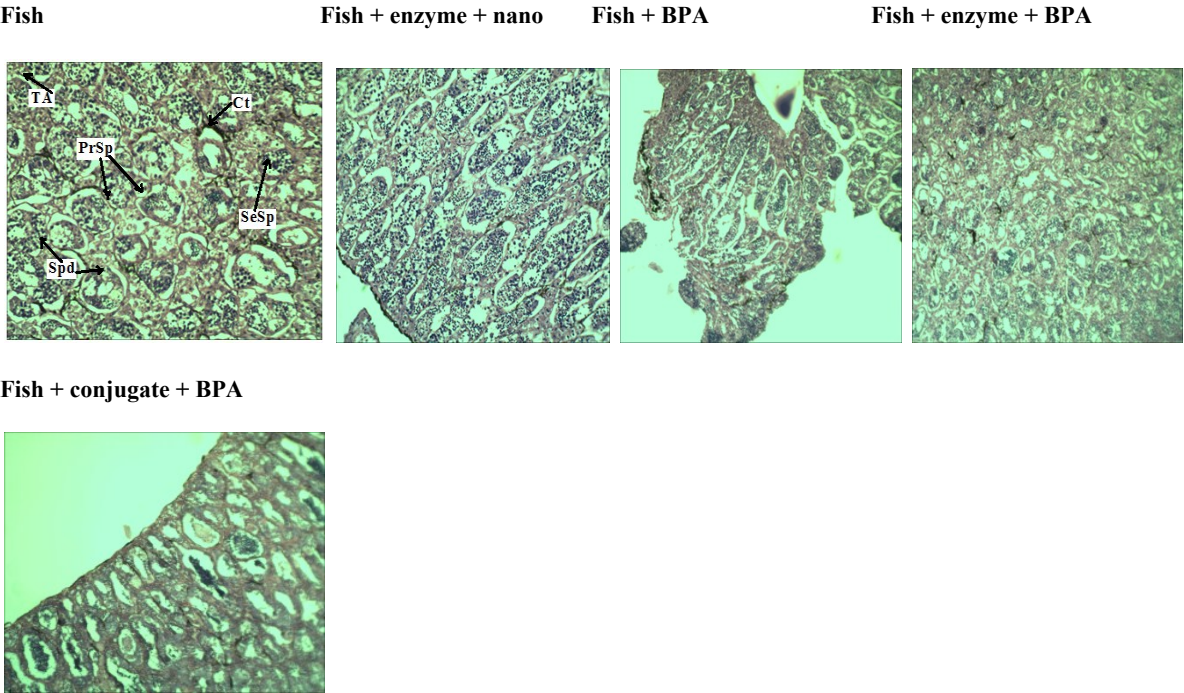

[TA-Tunica albuginea, Ct-Connective tissue, PrSp & SeSp- Primary &secondary spermatocytes, Spd-Spermatids.]

Figure: Sp-2) Dtermination of significant removal of BPA using conjugates using ESI-MS of liver sample.

Only fish

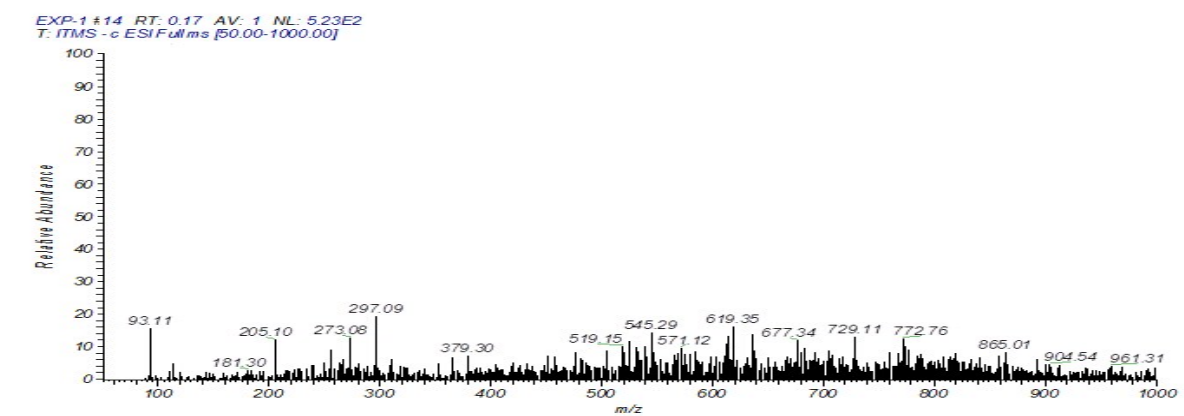

### Fish + enzyme + nano

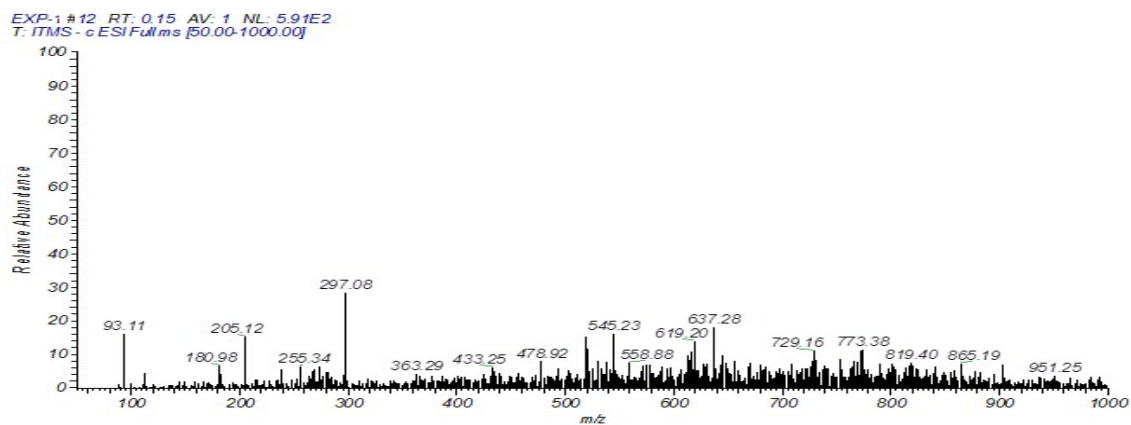

### Fish + BPA

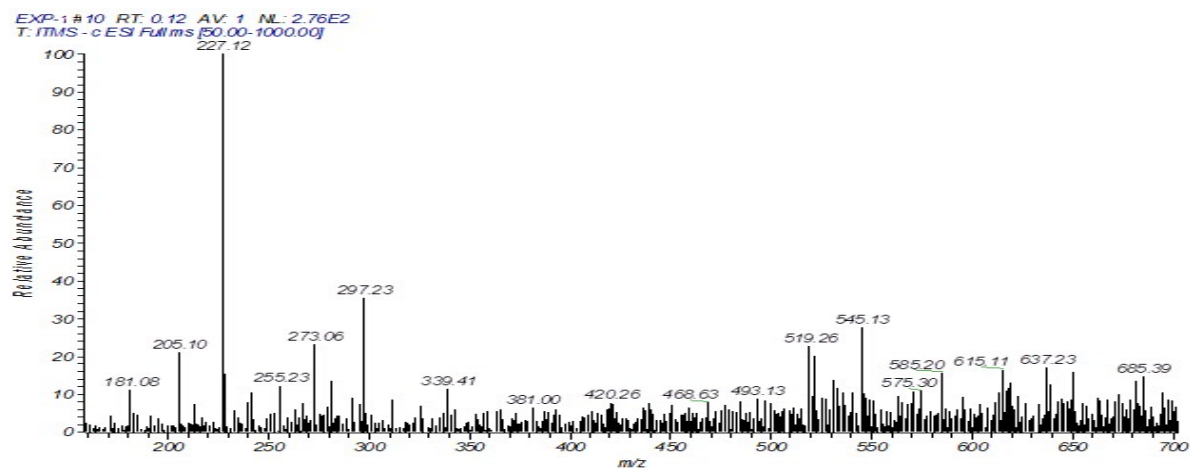

### Fish + enzyme + BPA

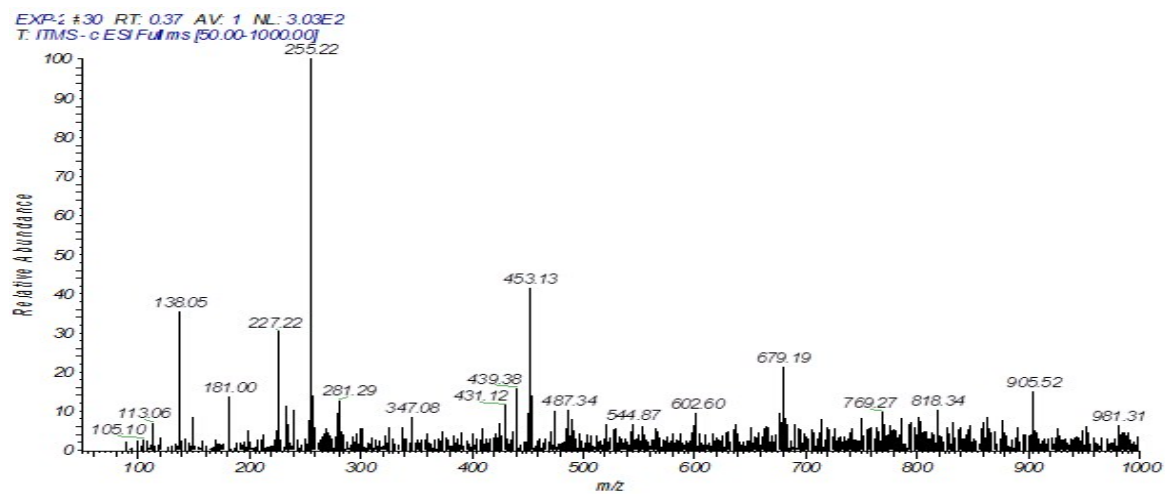

# **Fish + conjugate + BPA**

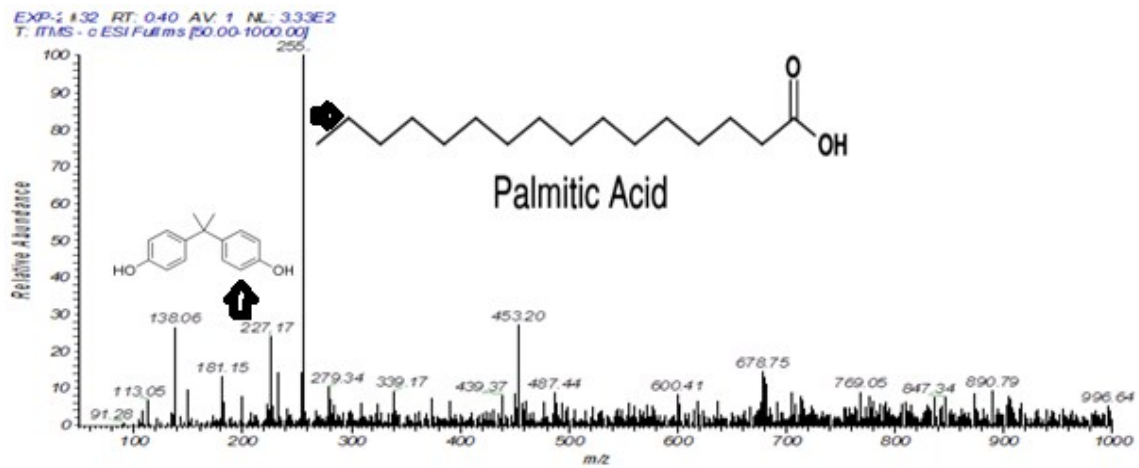

**Figure: Sp-3) Detection of vitellogenin synthesis variation using FPLC.**

## **Only Fish**

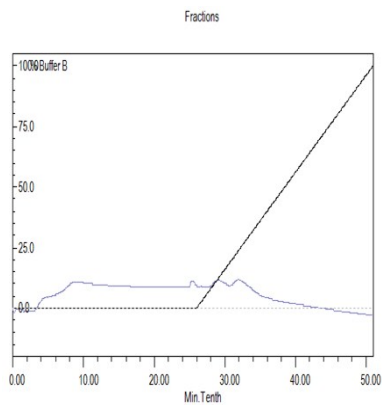

## **Fish + enzyme + nano**

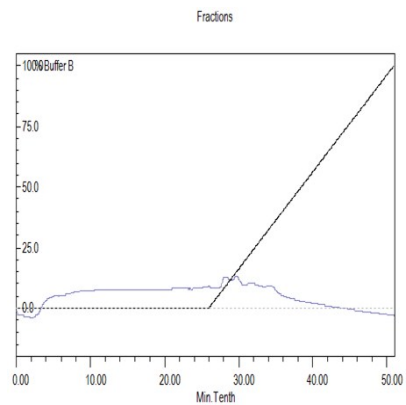

## **Fish+ BPA**

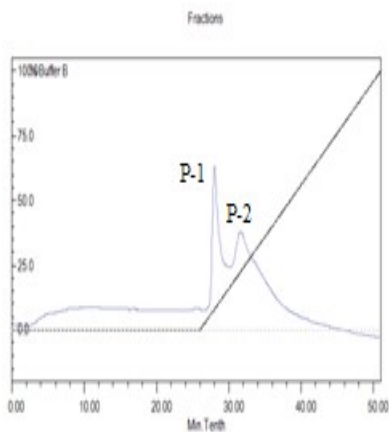

## **Fish+ enzyme+ BPA**

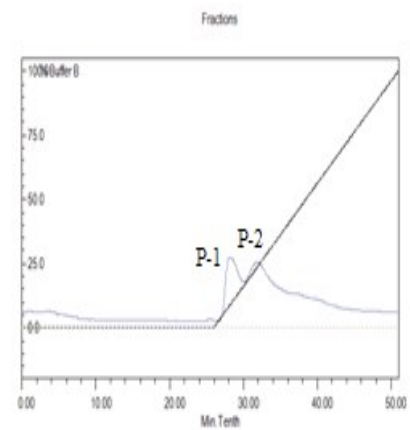

### Fish + conjugates + BPA

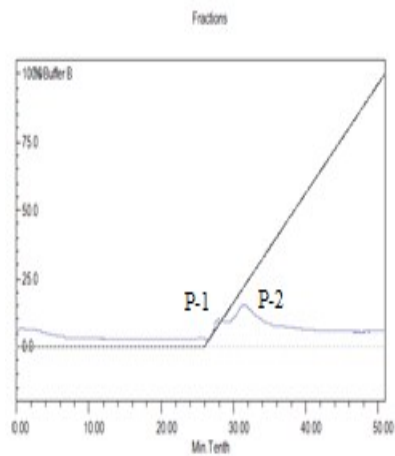

**Figure: Sp-4) Detection of vitellogenin production using FPLC in male fish.**

### BPA+ fish

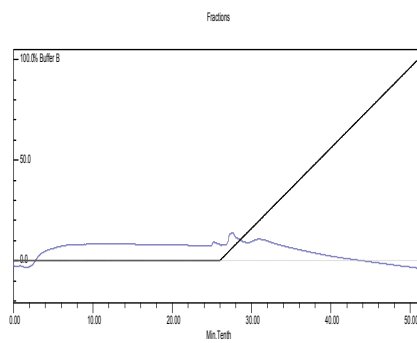

### BPA+ enzyme+ fish

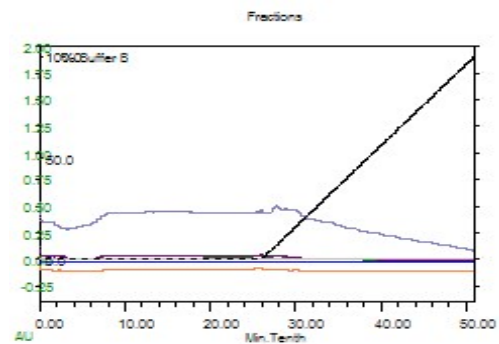

### Normal fish

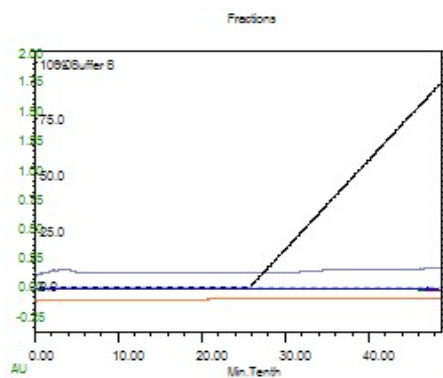

### Fish + enzyme + nano

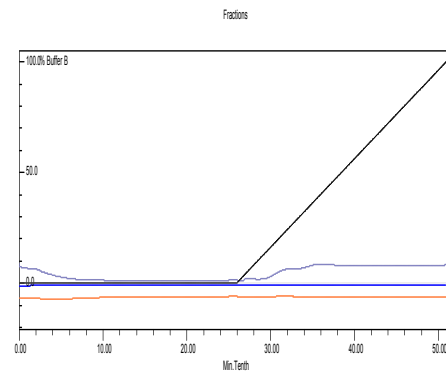



### Fish + conjugates +BPA

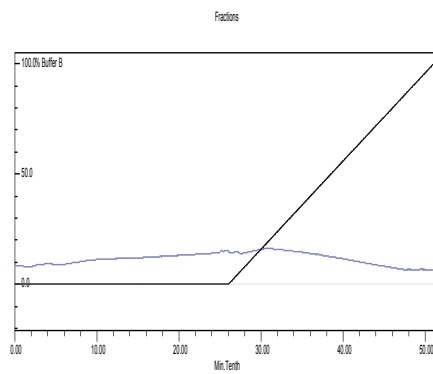

**Figure: Sp-5) SDS-PAGE of differentially treated female fish vitellogenin after getting from FPLC**

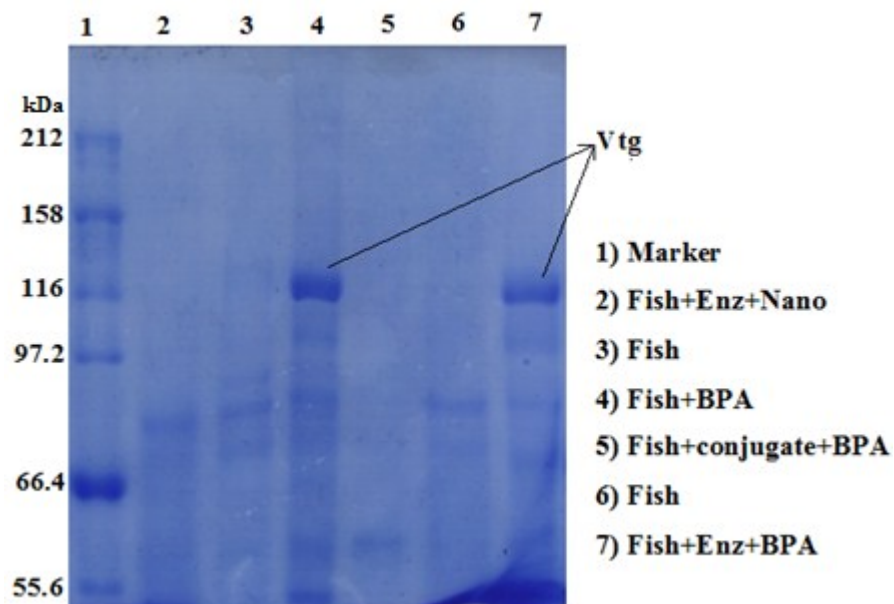

Supplement: c7en00070g1.pdf [file c7en00070g1.pdf]
